# Supplementary material for: Dual control of the nanofriction of graphene
Source: Royal Society of Chemistry journal article supplement (doi:10.1039/c9tc01148j), 2019-01-01
Supplement: c9tc01148j1.pdf [file c9tc01148j1.pdf]

## Supporting Information

### Dual control on nanofriction of graphene

Haojie Lang<sup>a</sup>, Yitian Peng<sup>a\*</sup>, Guowei Shao<sup>a</sup>, Kun Zou<sup>a</sup>, Guangming Tao<sup>b,c</sup>

(a. College of Mechanical Engineering, Donghua University, Shanghai 201620, China

b. State Key Laboratory for Modification of Chemical Fibers and Polymer Materials,  
Donghua University Shanghai 201620, China

c. Wuhan National Laboratory for Optoelectronics and the School of Optical and Electronic  
Information, Huazhong University of Science and Technology, Wuhan 430074, China)

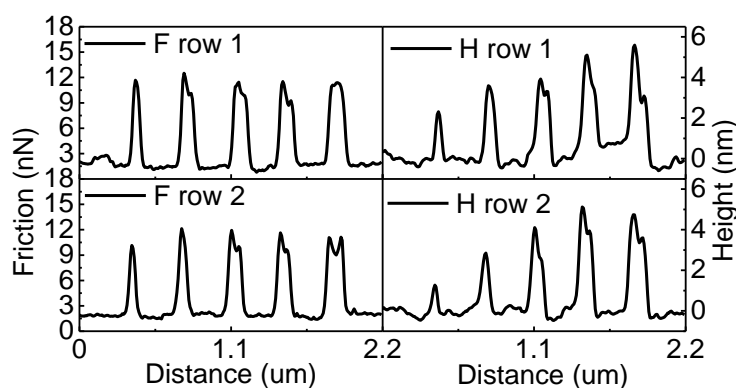

**Figure S1.** The corresponding frictional force and height profiles along each row in Figure 6(b) and 6(c).

\* Yitian Peng, Professor. Tel: +86 21 67874297. E-mail: [yitianpeng@dhu.edu.cn](mailto:yitianpeng@dhu.edu.cn) (Yitian Peng)

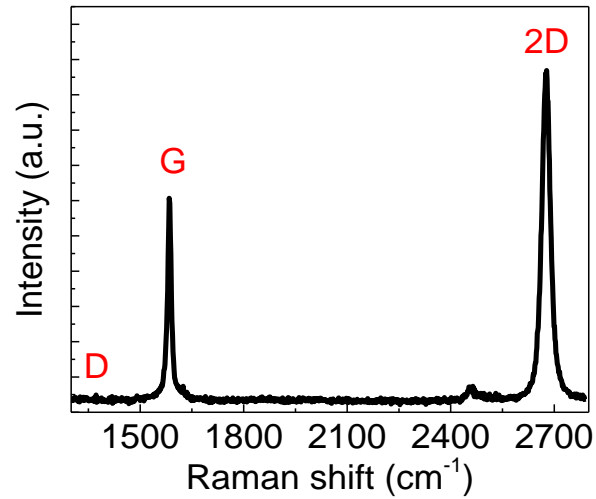

**Figure S2.** Raman spectrum of pristine graphene

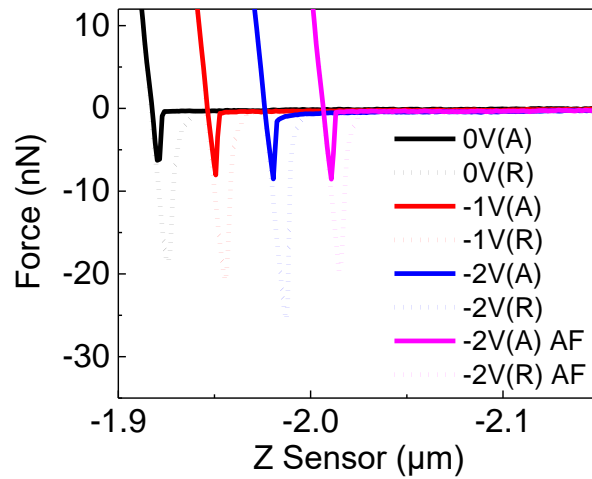

**Figure S3.** Force-distance curve measured on graphene by unbiased and negative biased tip. The black curve was measured by a neutral tip. The red curve is the first curve after the tip was negative biased. The adhesive force increased because of electrostatic force. The adhesive force decreased after continue contact.
